# Supplementary material for: Zonisamide Administration Improves Fatty Acid β-Oxidation in Parkinson’s Disease
Source: PubMed Central journal article supplement (PMC6356654; doi:10.3390/cells8010014), 2018-12-29
Supplement: cells-08-00014-s001.pdf [file cells-08-00014-s001.pdf]

1 **Supplementary materials:**

2 **Zonisamide administration improves fatty acid  $\beta$ -**  
3 **oxidation in Parkinson's disease.**

4 Shin-Ichi Ueno <sup>1</sup>, Shinji Saiki <sup>1,\*</sup>, Motoki Fujimaki <sup>1</sup>, Haruka Takeshige-Amano <sup>1</sup>, Taku Hatano <sup>1</sup>,  
5 Genko Oyama <sup>1</sup>, Kei-Ichi Ishikawa <sup>1,2</sup>, Akihiro Yamaguchi <sup>2</sup>, Wado Akamatsu <sup>2</sup> and Nobutaka  
6 Hattori <sup>1,\*</sup>

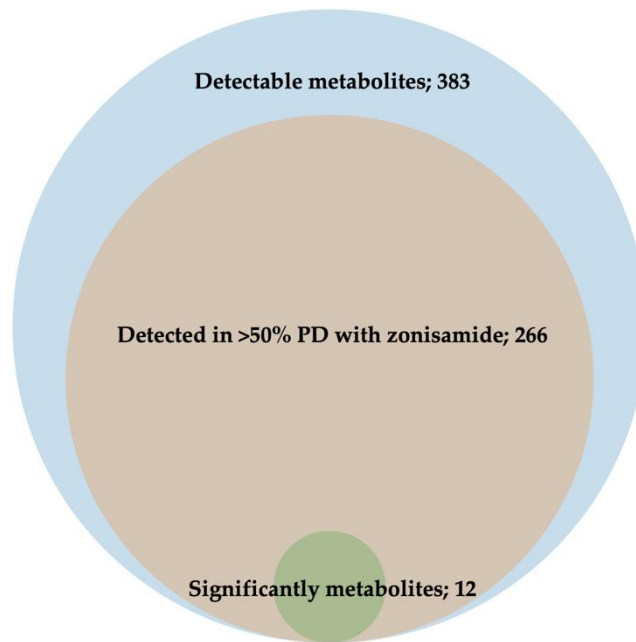

7 **Supplementary Figure 1.** Venn diagram showing the number of metabolites common to the  
8 experimental groups

9

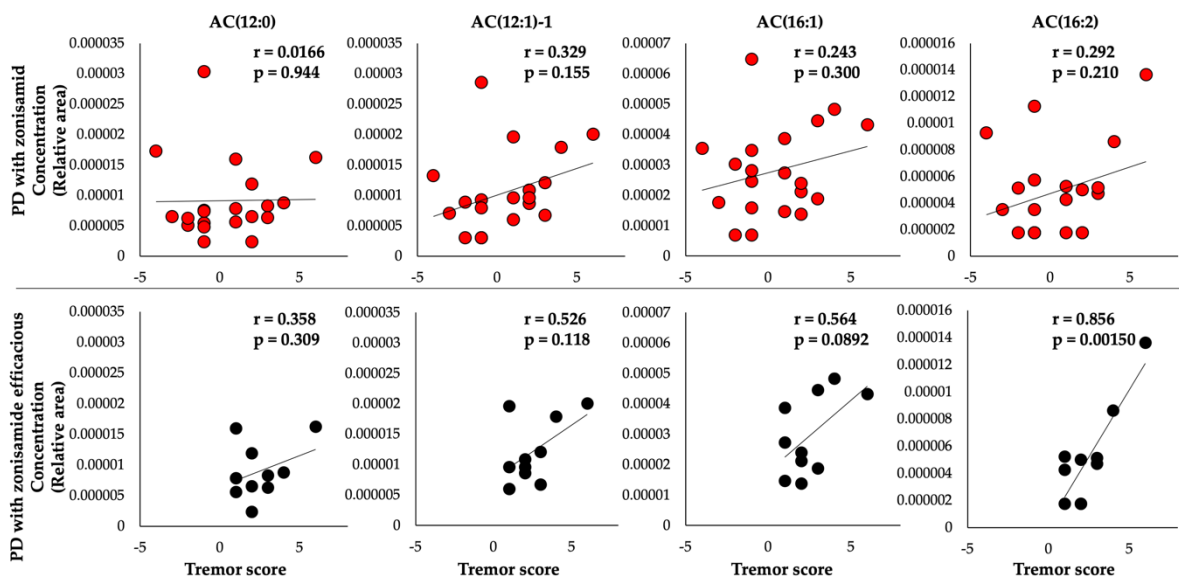

10 **Supplementary Figure 2.** Association of LCACs and tremor scores of UPDRS-III in motor  
 11 amelioration of Parkinson's disease with zonisamide. Red indicates a correlation of tremor scores and  
 12 LCACs in PD with zonisamide, while black indicates a correlation of tremor scores and LCACs in PD  
 13 with efficacious zonisamide. Abbreviations: LCACs: long-chain acylcarnitines, PD: Parkinson's  
 14 disease, UPDRS: Unified Parkinson's Disease Rating Scale. *p*-Value obtained by Spearman's rank  
 15 correlation coefficient.

16 **Supplementary Table 1.** Top 10 metabolites as factor loadings by partial least squares analysis.

| Compound             | R     | <i>p</i> -Value |
|----------------------|-------|-----------------|
| 1-methylnicotinamide | 0.467 | 0.00930         |
| Imidazolelactic acid | 0.430 | 0.0180          |
| XC0088               | 0.413 | 0.0230          |
| AC(16:1)             | 0.402 | 0.0280          |
| Stigmasterol         | 0.395 | 0.0310          |
| XC0016               | 0.382 | 0.0370          |
| Paraxanthine         | 0.381 | 0.0380          |
| Ornithine            | 0.376 | 0.0410          |
| AC(16:2)             | 0.368 | 0.0460          |
| AC(12:1)-1           | 0.359 | 0.0520          |

17 Abbreviations: XC0088, XC0016: unidentified metabolites annotated by Human Metabolome Technologies, Inc.  
 18 AC: acylcarnitine. *p*-Value obtained by partial least squares regression analysis.

19 **Supplementary Table 2.** Long-chain acylcarnitines in Parkinson's disease with or without  
 20 zonisamide.

| Compound, relative area | Ratio of zonisamide (+) to zonisamide (-) | <i>p</i> -Value |
|-------------------------|-------------------------------------------|-----------------|
| AC(12:0)                | 1.73                                      | 0.0407          |
| AC(12:1)-1              | 1.92                                      | 0.0405          |
| AC(12:1)-2              | 1.66                                      | <0.0001         |
| AC(12:1)-3              | 1.01                                      | 0.0113          |
| AC(13:1)-1              | 1.07                                      | 0.0142          |
| AC(13:1)-2              | 1.25                                      | 0.708           |
| AC(14:0)                | 1.54                                      | 0.320           |
| AC(14:1)                | 1.54                                      | 0.708           |
| AC(14:2)-1              | 1.50                                      | 0.179           |
| AC(14:2)-2              | -                                         | -               |
| AC(14:3)                | -                                         | -               |

|                   |      |        |
|-------------------|------|--------|
| <b>AC(15:0)</b>   | 1.00 | 0.912  |
| <b>AC(16:1)</b>   | 1.75 | 0.0366 |
| <b>AC(16:2)</b>   | 1.95 | 0.0054 |
| <b>AC(18:0)</b>   | 1.27 | 0.281  |
| <b>AC(18:1)</b>   | 1.38 | 0.165  |
| <b>AC(18:2)-1</b> | 1.27 | 0.165  |
| <b>AC(18:2)-2</b> | -    | -      |
| <b>AC(20:0)</b>   | -    | -      |
| <b>AC(20:1)</b>   | 1.27 | 0.322  |

21 Abbreviations: AC: acylcarnitine. *p*-Value obtained by Wilcoxon test.

22 **Supplementary Table 3.** The influence of zonisamide treatment duration and treatment dosage on  
23 the levels of four LCACs.

| <b>Dependent variable</b> | <b>AC(12:0)</b> | <b>AC(12:1)-1</b> | <b>AC(16:1)</b> | <b>AC(16:2)</b> |
|---------------------------|-----------------|-------------------|-----------------|-----------------|
|                           | <i>p</i> -Value | <i>p</i> -Value   | <i>p</i> -Value | <i>p</i> -Value |
| Treatment period          | 0.982           | 0.983             | 0.238           | 0.291           |
| Zonisamide dosage         | 0.284           | 0.0940            | 0.633           | 0.937           |

24 Abbreviations: LCACs: long-chain acylcarnitines, *p*-Value obtained by multivariable regression analysis.

25 **Supplementary Table 4.** Serum skeletal-muscle-associated proteins in Parkinson's disease with or  
26 without zonisamide.

|                                                          | <b>Zonisamide (-)</b> | <b>Zonisamide (+)</b> | <b><i>p</i>-Value</b> |
|----------------------------------------------------------|-----------------------|-----------------------|-----------------------|
| <b>Creatine kinase [IU/L]</b><br><b>Mean (SD) [N.A.]</b> | 223 (237)             | 104 (40.2) [2]        | 0.0798                |
| <b>Aldolase [IU/L]</b><br><b>Mean (SD) [N.A.]</b>        | 4.49 (0.881)          | 3.68 (0.738) [2]      | 0.0344                |
| <b>Creatinine [mg/dl]</b><br><b>Mean (SD)</b>            | 0.653 (0.141)         | 0.725 (0.256)         | 0.565                 |
| <b>HbA1c [%; NGSP]</b><br><b>Mean (SD)</b>               | 5.80 (0.258)          | 5.82 (0.474)          | 0.673                 |

27 Abbreviations: IU/L: international unit per liter, SD: standard deviation, NGSP: National Glycohemoglobin  
28 Standardization Program. *p*-Value obtained by Wilcoxon test. N.A. = not available
